RESEARCH ARTICLE

# Biomimetic model for computing missing data imputation and inconsistency reduction in pairwise comparisons matrices

Waldemar W. Koczkodaj<sup>1</sup> , Witold Pedrycz<sup>2</sup> ,  
Alexander Pigazzini<sup>3</sup> , Laura P. Pigazzini<sup>4</sup> 

**1** Department of Computer Science, Laurentian University, Sudbury, Ontario, Canada, **2** Department of Electrical and Computer Engineering, University of Alberta, Edmonton, Alberta, Canada, **3** Department of Mathematics, Mathematical and Physical Science Foundation, Slagelse, Denmark, **4** Liceo Statale A. Banfi, Liceo Scientifico Tradizionale, Vimercate, Italy

 These authors contributed equally to this work.

\* [wpedrycz@ualberta.ca](mailto:wpedrycz@ualberta.ca)

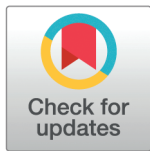

## OPEN ACCESS

**Citation:** Koczkodaj WW, Pedrycz W, Pigazzini A, Pigazzini LP (2025) Biomimetic model for computing missing data imputation and inconsistency reduction in pairwise comparisons matrices. PLoS One 20(8): e0329171. <https://doi.org/10.1371/journal.pone.0329171>

**Editor:** Karthikeyan Thiagarajan, Amity University, INDIA

**Received:** December 10, 2024

**Accepted:** July 12, 2025

**Published:** August 7, 2025

**Copyright:** © 2025 Koczkodaj et al. This is an open access article distributed under the terms of the [Creative Commons Attribution License](https://creativecommons.org/licenses/by/4.0/), which permits unrestricted use, distribution, and reproduction in any medium, provided the original author and source are credited.

**Data availability statement:** All relevant data are within the manuscript.

**Funding:** The author(s) received no specific funding for this work.

**Competing interests:** No authors have competing interests: Waldemar W. Koczkodaj, Witold Pedrycz, Alexander Pigazzini, Laura P. Pigazzini.

## Abstract

A biomimetic model is presented to compute missing data imputation and reduce inconsistencies in pairwise comparisons matrices. The proposed regeneration method emulates three primary phases of a biological process: identifying the most damaged areas (by identifying inconsistencies in the pairwise comparison matrix), cell proliferation (filling in missing data), and stabilization (optimization of global consistency). An iterative algorithm is employed to correct inconsistencies and compute missing data imputations within the pairwise comparison matrix. The results demonstrate that the biomimetic approach is robust and reliably converges to a consistent solution.

## 1 Introduction

Nature has inspired numerous researchers to develop materials, structures, tools, mechanisms, processes, algorithms, and methods.

Self-healing approaches are presented in [1]. A review of inspiration by nature for the potential development of biomimicry appeared in [2]. The pairwise comparison method (PC or PCs, depending on the context) plays a significant role in assessments, subjective measurements, and decision-making. In various applied sciences, such as engineering, physics, and medicine, physical measurements-like length, weight, area, volume, and temperature are of fundamental importance. However, many researchers who rely on these physical measurements may not realize how frequently subjective measurements are utilized in practice. In fact, subjective measures can often be applied to a broader range of entities than objective measures. For example, evaluating student performance is necessary to award academic degrees, which are crucial to our civilization. Most academic exams rely on rating scales, and pairwise comparisons can enhance these scales used to assess the learning process. The most important challenges to address for the pairwise comparison method include the following:

1. reduction of inconsistency (not necessarily to zero),
2. finding the nearest consistent PC matrix by optimization,
3. computing the imputation of missing data, known as the regeneration problem.

The importance of reducing inconsistency in pairwise comparisons (PC) matrices has led to a search for methods to measure and locate it. The inconsistency concept is illustrated by Fig 1.

Traditionally, values of pairwise comparisons are stored in square PC matrices (see [3]). PC matrices have all strictly positive real elements. Each element of a matrix represents a ratio between two entities. Entities may be physical objects (e.g., volumes of river rocks) or abstract concepts (software attributes). More often than not, PCs are used for decision-making. The quality of decisions can be compromised by two main issues: *inconsistency* in the evaluations and *missing PC matrix elements*:

- *inconsistency* in a triad  $(i,j,k)$  is quantified by the index

$$K_{ijk} = \min \left( \left| 1 - \frac{a_{ik}}{a_{ij} \cdot a_{jk}} \right|, \left| 1 - \frac{a_{ij} \cdot a_{jk}}{a_{ik}} \right| \right),$$

which measures the deviation from the consistency condition  $a_{ik} = a_{ij} \cdot a_{jk}$ . Its value is non-zero, when appropriate assessments within a PC matrix are intransitive. For example, if  $a_{ij} = 2$  and  $a_{jk} = 3$ , then the element  $a_{ik}$  should be  $a_{ij} \cdot a_{jk} = 6$ . If  $a_{ik}$  differs from this value, inconsistency arises.

- *missing data imputation* when some elements of the PC matrix are unknown.

The pairwise comparisons method tolerates or even utilizes inconsistency in assessments. By analyzing inconsistency, we may improve data acquisition or replace the least probable value in a triad by assuming that it is missing and using the proposed missing data imputation approach.

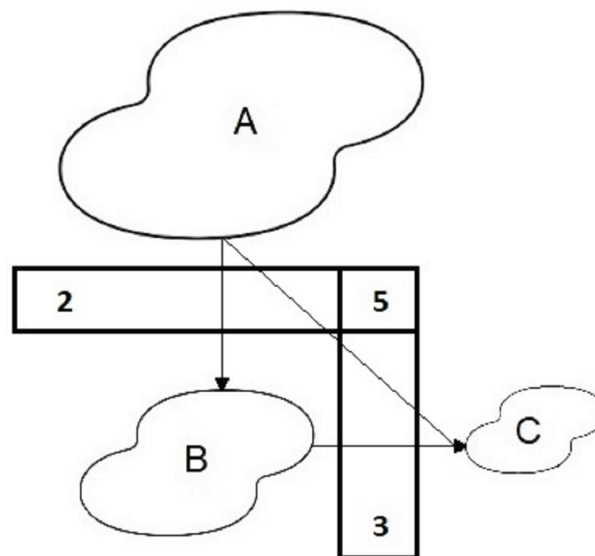

**Fig 1. Inconsistency concept for a triad (2, 5, 3).**

<https://doi.org/10.1371/journal.pone.0329171.g001>

Inconsistency is related to the number of comparisons. For a PC matrix  $M$  of the size  $n$ , it is  $n \cdot (n - 1)/2$  in the upper triangle while the minimum number of comparisons is  $n - 1$  (for details, see [4]). When there is more data than the required minimum, inconsistency may occur. This principle was addressed in [4] and it is illustrated here in Fig 1. Values 2, 5, and 3 are labels for the arrows between entities. It shows our (subjective) assessment of the entity A area when compared with B as 2. Value 3 shows that the area of B is three times bigger than C. If the ratios between A and B and C were accurate, the ratio of areas A and C should be  $2 \cdot 3 = 6$ . However, our assessment is 5 and illustrates inconsistency. It is necessary to note the use of the conditional phrase "If the ratios between A and B and C were accurate" in the above text. We do not assume that any of the ratios A/B, B/C or even A/C are accurate. This is why ratio estimations can be inconsistent, and we need to compute the inconsistency.

Even when assessments are fully consistent, there is no guarantee that the resulting priority vector will be accurate. For example, a PC matrix filled entirely with 1s is completely consistent, but it does not provide useful prioritization information. To address this, recent research has introduced the concept of entropy of the priority vector to measure the information content of inconsistent PC matrices (see [5]). This approach demonstrates that the entropy of priority vectors for consistent matrices follows a normal distribution.

According to [6]:

biomimetic, also known as biomimicry, is defined as the imitation of biological processes or models from nature aiming to solve various complex biological problems, such as drug production in biomedical applications and the characterization of nanostructured biohybrid materials.

In practical terms, the use of pairs in biology is substantial. It is not only applicable to sex but also to legs, hands, eyes, ears, and more. For this reason, we may consider the pairwise comparisons method as a crown example of biomimicry. The pairwise comparisons method has much to learn from biomimetics. This article serves as a call to action. Using biomimetics in pairwise comparisons method is highly advisable.

We propose a model inspired by the process of biological tissue regeneration, in which an organism repairs its damaged tissues. Tissue engineering (see, [7–18]) aims to regenerate or replace damaged tissues with new cells. A crucial component of this process is the scaffold. It is a three-dimensional structure that provides support for cells by mimicking the extracellular matrix (ECM) (see [19]). The biomimetic approach in scaffold design enhances cellular integration, often inspired by biological mechanisms (see [20]) designed to achieve controlled interactions, as seen in nanoparticle uptake models (see [13]). These scaffolds and biomimetic devices address challenges in tissue repair and inflammation control, as explored in the selective cytopheretic device for sepsis (see [12]). The application of these design principles emphasizes collaborative efforts aimed at optimizing tissue regeneration and scaffold-based therapies.

Several studies have addressed inconsistency reduction and missing data imputation in PC matrices. Numerous methods (e.g., scaling techniques [21], inconsistency minimization algorithms [22], or traditional statistical approaches [23]) focus on correcting inconsistencies but do not simultaneously handle missing data imputation. Some recent approaches, such as those based on non-linear optimization [24] and weighted least squares models [25], estimate missing data imputation by minimizing inconsistency. However, they do not integrate biological principles for a dynamic interaction between the two problems. Furthermore, classifications such as in [23] list categories of methods for PC matrices (e.g. scaling methods, statistical methods) but do not include biomimetic approaches.

Our approach differs from other approaches. It is inspired by the process of tissue regeneration, which allows us to address inconsistencies and missing data imputation simultaneously and iteratively, ensuring convergence towards consistent solutions.

Recent advances in missing data imputation have explored diverse domains and methodologies. In the clinical setting, the DACMI Challenge [26] has demonstrated the effectiveness of machine learning approaches such as:

- gradient boosting, LightGBM - (<https://github.com/microsoft/LightGBM>), documentation available on <https://lightgbm.readthedocs.io/en/stable/>.
- statistical techniques (e.g., MICE, see [27], available as an R package at <https://cran.r-project.org/web/packages/mice/index.html>).

They handle incomplete temporal data.

Missing data imputation methodologies, such as multiple imputation, MI, see as reference [28], and maximum likelihood estimation, have been applied in numerous disciplines to fill numerical and categorical gaps [29]. However, these approaches prioritize statistical plausibility and scalability and do not address the specific challenges of PC matrices, where logical consistency is critical despite missing or conflicting entries.

The proposed biomimetic regeneration model fills this gap by using iterative inconsistency correction, inspired by biological repair mechanisms, and through dimensionality reduction approaches (such as PCA, see *Appendix B*), ensures consistency in PC matrices entries, a requirement not satisfied by existing methods [30].

## 2 Tissue regeneration model for PC matrices

According to [31], *regeneration*, in biology, is the process by which some organisms replace or restore lost or amputated body parts.

### Biological concepts of regeneration

Tissue regeneration involves the following three main phases:

1. *identification of the damaged area*: the body identifies the damaged or missing areas of the tissue,
2. *cell proliferation*: cells proliferate to replace damaged cells, following a controlled growth process,
3. *remodelling and stabilization* of the new tissue integrates with the existing one, stabilizing and restoring the original functionality.

### Mathematical transposition into an algorithm for PC matrices

Transposing the above-mentioned process into a mathematical context requires the following iterative algorithm.

#### Algorithm: regeneration of a PC Matrix

1. Identify damaged areas in the matrix (inconsistencies),
2. Proliferate new values for missing entries,
3. Reshape and stabilize the matrix reducing global inconsistency.

## Tissue regeneration algorithm for PC matrices

*Input:* Pairwise comparison matrix  $A$  of size  $n \times n$ , with missing and/or inconsistent entries.

1. *Step 1 (Identification of damaged areas):* The inconsistent triads, representing the "damaged" regions that need correction, are identified.
2. Proliferate new values for missing entries,
3. Reshape and stabilize the matrix reducing global inconsistency.
4. *Step 2 (Cellular proliferation):*

The missing data imputation  $a_{ij}$  are initialized with the geometric mean of the involved triads (e.g.,  $a_{ij}^{(0)} = \sqrt{a_{ik} \cdot a_{kj}}$ ). Subsequently, they are iteratively updated by the formula  $a_{ij}^{(t+1)} = a_{ij}^{(t)} + \eta \cdot \left( \frac{1}{n-2} \sum_{k \neq i,j} \frac{a_{ik} \cdot a_{kj}}{a_{ij}} - a_{ij} \right)$  until the value tends to stabilize.

5. *Step 3 (Matrix Stabilization):*

The gradient method is applied to minimize  $\sum (K_{ijk})^2$ . The algorithm continues to iterate until the overall inconsistency drops below a predefined threshold or a maximum number of iterations is reached, ensuring convergence to a more consistent matrix. For  $K_{ii}$ , the 1/3 threshold is proposed as reasonable for most applications. Similarly to  $p$ -value in statistics, it is an arbitrary value often found by experimental research.

*Output:* Pairwise comparisons matrix  $A'$ , consistent and complete. The inconsistency in the PC matrix and the previous three steps are discussed in the following.

### Step 1: Identification of damaged areas

1. *Computing of inconsistency index  $K_{iiijk}$ :* For each triad of elements  $(i,j,k)$  in matrix  $A$ , the inconsistency index  $K_{iiijk}$  is computed as:

$$K_{iiijk} = \min \left( \left| 1 - \frac{a_{ik}}{a_{ij} \cdot a_{jk}} \right|, \left| 1 - \frac{a_{ij} \cdot a_{jk}}{a_{ik}} \right| \right),$$

or the equivalent exponential Koczkodaj-Szwarc formula (see, [32]):

$$K_{ii}(x, y, z) = 1 - e^{-|\ln(\frac{y}{xz})|}$$

This index quantifies the deviation from the ideal consistency condition  $a_{ik} = a_{ij} \cdot a_{jk}$ .

2. *Identification of inconsistent triads:* Identify the triads  $(i^*, j^*, k^*)$  with the maximum value of  $K_{iiijk}$ , defining these areas as the most inconsistent in the matrix. These triads correspond to the "damaged zones" to be corrected.

### Step 2: Cell proliferation

1. *Initialization of missing entries:* For each missing value  $a_{ij}$ , initialize the value  $a_{ij}^{(0)}$  using an estimate based on existing values. A possible estimate is the geometric mean of the products of known pairs:

$$a_{ij}^{(0)} = \sqrt{a_{ik} \cdot a_{kj}} \quad \text{for every } k \neq i, j \quad \text{and} \quad i \neq j, \quad \text{with} \quad i, j, k \in 1, 2, \dots, n.$$

This is done for each triad with a missing value. Finally, a geometric mean of the values obtained is computed and inserted in place of the missing value. This is analogous to the cell proliferation that fills the void created by the injury.

2. *Iterative update*: for each iteration  $t$ , update the values of missing entries and inconsistent triads to reduce inconsistency:

$$a_{ij}^{(t+1)} = a_{ij}^{(t)} + \eta \cdot \left( \frac{1}{3} \sum_{k \neq i,j} \left( \frac{a_{ik}^{(t)} \cdot a_{kj}^{(t)}}{a_{ij}^{(t)}} \right) - a_{ij}^{(t)} \right)$$

where  $\eta$  is a learning parameter controlling the update speed. This step is similar to the controlled growth of new tissue to repair damage.

### Step 3: Iteration and stabilization

1. *Consistency optimization*: The next step is to optimize the PC matrix to minimize global inconsistency. An optimization algorithm, such as the gradient method, is used to minimize the sum of the squares of the inconsistency indices:

$$\text{minimize} \quad \sum_{i,j,k} \left( Kii_{ijk}^{(t)} \right)^2$$

Calculating the gradient with respect to each element  $a_{ij}$ :

$$\frac{\partial Kii_{ijk}}{\partial a_{ij}} = \frac{\partial}{\partial a_{ij}} \min \left( \left| 1 - \frac{a_{ik}}{a_{ij} \cdot a_{jk}} \right|, \left| 1 - \frac{a_{ij} \cdot a_{jk}}{a_{ik}} \right| \right)$$

It updates the values of  $a_{ij}$  accordingly.

2. *Stabilization*: The algorithm continues iterating until the overall inconsistency  $\sum_{i,j,k} Kii_{ijk}$  falls below a predefined threshold  $\epsilon_{\min}$  or a maximum number of iterations is reached. This step corresponds to the regenerated tissue, integrating it with the pre-existing tissue.

## 3 Analysis of the convergence and robustness of the algorithm

Consider a matrix  $A \in \mathbb{R}^{n \times n}$ , whose elements  $a_{ij}$  represent pairwise comparisons between entities  $i$  and  $j$ . The goal of the algorithm is to correct the inconsistency in the matrix  $A$ . We define the local inconsistency of a triad  $(i,j,k)$  by the index  $Kijk$ , as:

$$Kijk = \min \left( \left| 1 - \frac{a_{ik}}{a_{ij} a_{jk}} \right|, \left| 1 - \frac{a_{ij} a_{jk}}{a_{ik}} \right| \right)$$

The global inconsistency  $I(A)$  is then the sum of the local inconsistencies for all triads in the matrix:

$$I(A) = \sum_{i,j,k} Kijk$$

We reduce  $I(A)$  for each iteration until the inconsistency is acceptable, i.e.,  $I(A) \leq \epsilon_{\min}$ , where  $\epsilon_{\min}$  is a stopping threshold.

The elements  $a_{ij}$  of the PC matrix are iteratively updated according to this rule:

$$a_{ij}^{(t+1)} = a_{ij}^{(t)} + \eta \cdot \Delta a_{ij}^{(t)}$$

where  $\Delta a_{ij}^{(t)}$  represents a correction based on the local inconsistency and  $\eta$  is a positive learning rate that controls the magnitude of the update. The term  $\Delta a_{ij}^{(t)}$  can be expressed as:

$$\Delta a_{ij}^{(t)} = \frac{1}{3} \sum_{k \neq i, j} \left( \frac{a_{ik}^{(t)} a_{kj}^{(t)}}{a_{ij}^{(t)}} - a_{ij}^{(t)} \right)$$

The goal of this update rule is to correct the elements of the PC matrix that contribute the most to inconsistency, iteratively reducing  $I(A)$ .

To demonstrate that the algorithm converges, we need to show that the function  $I(A)$  is non-increasing, meaning that at each step the global inconsistency decreases:

$$I(A^{(t+1)}) \leq I(A^{(t)})$$

In order to reduce  $I(A)$  at each iteration, the update of the matrix elements follows the gradient descent method. The gradient of  $I(A)$  with respect to  $a_{ij}$  is given by:

$$\nabla_{a_{ij}} I(A) = \frac{\partial I(A)}{\partial a_{ij}}$$

The update of  $a_{ij}$  is done in the direction opposite to the gradient:

$$\Delta a_{ij}^{(t)} = -\nabla_{a_{ij}} I(A^{(t)})$$

This ensures that the global inconsistency  $I(A)$  decreases as the update rule modifies  $a_{ij}$  in the direction that reduces  $I(A)$  as quickly as possible.

In order for the algorithm to converge, the variation  $\eta \cdot \Delta a_{ij}$  cannot be too large. If  $\eta$  is too large, we might overshoot the minimum of the function  $I(A)$  in a single step, causing instability or divergence.

Let us consider a second-order approximation for  $I(A)$  in terms of  $a_{ij}$ :

$$I(A^{(t+1)}) \approx I(A^{(t)}) + \nabla_{a_{ij}} I(A^{(t)}) \cdot (a_{ij}^{(t+1)} - a_{ij}^{(t)}) + \frac{1}{2} \nabla_{a_{ij}}^2 I(A) \cdot (a_{ij}^{(t+1)} - a_{ij}^{(t)})^2$$

Substituting the update rule  $a_{ij}^{(t+1)} = a_{ij}^{(t)} - \eta \nabla_{a_{ij}} I(A^{(t)})$ , we get:

$$I(A^{(t+1)}) \approx I(A^{(t)}) - \eta (\nabla_{a_{ij}} I(A^{(t)}))^2 + \frac{1}{2} \eta^2 \nabla_{a_{ij}}^2 I(A) \cdot (\nabla_{a_{ij}} I(A^{(t)}))^2$$

In order for  $I(A^{(t+1)}) \leq I(A^{(t)})$ , the second term must be negative and dominate the third term. This leads us to the condition:

$$\eta \leq \frac{2}{\max_{i,j} \nabla_{a_{ij}}^2 I(A)}$$

where  $\nabla^2 I(A)$  represents the second derivative of the function, specifically indicating how quickly the gradient of  $I(A)$  changes as a function of the matrix elements  $a_{ij}$ . The second derivative provides insight into the local behaviour of the function and helps determine how to update the matrix to reduce inconsistency. The second derivative of the function  $I(A)$  with respect to  $a_{ij}$  is:

$$\nabla_{a_{ij}}^2 I(A) = \frac{\partial^2 I(A)}{\partial a_{ij}^2}$$

This expression represents how the rate of change (the gradient) of the global inconsistency function  $I(A)$  itself changes as we adjust  $a_{ij}$ . In simpler terms, it tells us how sharply or smoothly the function changes in response to variations in the matrix element  $a_{ij}$ .

Interpretation of the Second Derivative:

- If  $\nabla_{a_{ij}}^2 I(A) > 0$ , the function is locally increasing (convex behaviour), and a small change in  $a_{ij}$  will cause the function to increase in that direction.
- If  $\nabla_{a_{ij}}^2 I(A) < 0$ , the function is locally decreasing (concave behaviour), and a change in  $a_{ij}$  will cause the function to decrease.

The condition  $\eta \leq \frac{2}{\max_{i,j} \nabla_{a_{ij}}^2 I(A)}$  ensures that the update step is approximately sized to avoid overshooting the minimum or causing oscillations. This guarantees that each step of the algorithm moves in a controlled way toward minimizing the inconsistency function  $I(A)$ .

Since  $\eta$  is chosen to satisfy the above condition, the term  $-\eta (\nabla_{a_{ij}} I(A^{(t)}))^2$  dominates the second-order term. Therefore:

$$I(A^{(t+1)}) \leq I(A^{(t)})$$

which proves that the global inconsistency decreases or remains constant at each step.

The algorithm is robust to small perturbations in the initial values and parameters. Small variations in the initial values  $a_{ij}^{(0)}$  lead to only small variations in the final behaviour of the algorithm, as successive corrections gradually reduce the inconsistency until a stable solution is reached.

The proposed algorithm converges under the conditions established for  $\eta$ , ensuring a continuous reduction of the global inconsistency  $I(A)$  at each iteration. The parameter  $\eta$  must be chosen based on the maximum curvature of the inconsistency function  $I(A)$  to ensure stability and avoid oscillations.

The convergence properties of the algorithm are not only mathematically proven but also have direct implications for real-world applications. In decision-making systems where consistency is critical (e.g., medical diagnostics or engineering safety assessments), the guaranteed convergence ensures that the algorithm does not indefinitely oscillate between inconsistent states. For instance, in a robotic control system requiring real-time adjustments of priorities (as in [33]), the bounded global inconsistency  $I(A)$  guarantees stable operational parameters even in dynamic environments.

The learning rate  $\eta$  plays a dual role in balancing convergence speed and numerical stability:

- Low  $\eta$  (e.g.,  $\eta = 0.05$ ): Ensures smooth, stable updates but may require more iterations, suitable for scenarios where precision is prioritized over speed (e.g., clinical decision-making).



- High  $\eta$  (e.g.,  $\eta = 0.2$ ): Accelerates convergence but risks overshooting optimal values, acceptable in non-critical applications (e.g., inventory prioritization) where computational efficiency is paramount.

In applications,  $\eta$  must be calibrated based on the problem's sensitivity to noise. For example, in the medical example cited in [12], where tissue-regeneration-inspired matrices are used to prioritize treatments, a conservative  $\eta$  prevents destabilizing fluctuations in critical thresholds.

## The lower bound of inconsistency

The global inconsistency  $I(A)$  is a sum of non-negative terms. It is bounded below by zero:

$$I(A) = \sum_{i,j,k} K_{ijk} \geq 0$$

Therefore, there exists a lower bound  $\epsilon_{\min}$  (fixed at will), such that  $I(A)$  cannot fall below this threshold. If the algorithm continues to reduce inconsistency but cannot drop below  $\epsilon_{\min}$ , it must stop once  $I(A)$  approaches this value.

## Convergence to a stable solution

To prove that the algorithm will converge to a stable solution, consider the sequence  $\{I(A^{(t)})\}_{t \geq 0}$ . We have already shown that this sequence is non-increasing and bounded below by  $\epsilon_{\min}$ . By the convergence theorem of a bounded and monotonic sequence,  $\{I(A^{(t)})\}$  will converge to a limit value  $I^*$ .

The algorithm follows the gradient descent that minimizes  $I(A)$ . We can conclude that the algorithm converges to a PC matrix  $A^*$  with an inconsistency level  $I^*$ , which can be zero or an arbitrary acceptable value:

$$\lim_{t \rightarrow \infty} I(A^{(t)}) = I^*$$

If the algorithm approaches  $I^*$  by a small arbitrary value, we consider  $A^*$  as a consistent or nearly consistent matrix, resolving the inconsistency reduction problem.

The “arbitrary level” for inconsistency is similar to the concept of “p-value” in statistics. We are aware that it is not an ideal solution, but it follows the “good enough is perfect” approach proposed by Herbert A. Simon. It is a part of his *bounded rationality principle* that was a major contribution to earning him both Turing and Nobel prizes.

Even if the initial estimates of the missing data imputation may not be perfect, the biomimetic approach is robust and tends to correct them by regeneration. The initial inaccuracy is improved through iteration and optimization. It mimics the tissue regeneration of how an organism corrects initial mistakes during tissue repair.

## Computational complexity

The computational complexity of the proposed method is  $O(n^3)$ , where  $n$  represents the dimension of the matrix (i.e., the number of elements being compared). It is determined by:

1. the algorithm computes inconsistencies for every triad in a PC matrix indexed by  $(i,j,k)$ ; the number of all possible triads in an  $n \times n$  PC matrix is  $\binom{n}{3}$ , which is  $O(n^3)$ ,

2. during each iteration, the values of the inconsistent elements in the matrix are updated to reduce the global inconsistency. The number of elements in a matrix is  $O(n^2)$ , and in each iteration, these values must be computed and updated.

Step 1 dominates the computational complexity, since each triad is evaluated in every iteration. However, no other mathematically correct method can avoid processing all triads since the number of all triads grows with  $n^3$ . Fortunately, the PC matrix size is small (not exceeding 8 in most methodologies based on PC method).

The number of iterations required for convergence depends on the initial level of inconsistency in the matrix and the threshold value  $\epsilon_{\min}$  chosen for acceptable inconsistency. A very small threshold requires more iterations, increasing.

For PC matrices, the elements below the main diagonal are the reciprocals of the elements above the diagonal. Consequently, we can compute and update only the upper half of the matrix, leading to savings in both computational time and memory usage. Furthermore, for large matrices, optimization techniques based on approximation methods, such as iterative methods (e.g., gradient descent with momentum), low-rank approximations (e.g., singular value decomposition or matrix factorization), can be applied to accelerate convergence, or principal component analysis (PCA) for dimensionality reduction.

While the proposed biomimetic algorithm exhibits  $O(n^3)$  complexity due to triad evaluation, this aligns with other specialized methods for PC matrix inconsistency reduction and imputation. For example, nonlinear optimization approaches (e.g., [24]) and weighted least squares models (e.g., [25]) also require  $O(n^3)$  operations due to matrix inversion or gradient-based steps. However, our iterative update rule avoids full matrix inversion, offering practical efficiency gains for small-to-medium-sized PC matrices ( $n \leq 8$ ).

For large matrices ( $n > 10$ ), our method's complexity can be reduced (via PCA, see *Appendix B*), comparable to low-rank approximation techniques. In contrast, general-purpose imputation methods like MICE [30] or LightGBM [26], while offering  $O(n^2)$  asymptotic efficiency, fail to enforce PC matrix consistency constraints, a critical limitation for decision-making applications. Table 1 summarizes the theoretical and practical trade-offs between methods, highlighting the unique capability of our approach to simultaneously address inconsistency reduction and missing data imputation without sacrificing scalability through dimensionality reduction.

The presented biomimetic approach simultaneously computes inconsistencies and missing data imputation. We are unaware of any other method capable to do it this way.

**Table 1. Comparison of methods for inconsistency reduction and missing data imputation in pairwise comparison matrices.**

| Method                       | Complexity<br>$O(\cdot)$ | Consistency<br>Guaranteed | Handling<br>Missing Data     |
|------------------------------|--------------------------|---------------------------|------------------------------|
| <b>Biomimetic (Proposed)</b> | $O(n^3)$                 | Yes                       | Yes                          |
| Nonlinear Optim. [24]        | $O(n^3)$                 | Yes                       | No (requires initialization) |
| Wtd. Least Squares [25]      | $O(n^3)$                 | Yes                       | No                           |
| MICE/LightGBM [26,30]        | $O(n^2)$                 | No                        | Yes                          |

<https://doi.org/10.1371/journal.pone.0329171.t001>

## 4 A more comprehensive real-life example

There are two practical challenges associated with real-life examples of PC solutions.

1. Non-trivial problems, such as selecting a site for nuclear waste disposal, often take several years to resolve and can easily cost millions of dollars.
2. These problems are highly specialized, making them understandable only to a small group of domain experts.

For these reasons, we have used an example from [34]. It pertains to a crucial and urgent research topic: autism in children, which aligns with the scope of PLOS ONE.

### 4.1 Method

To avoid self-plagiarism (by copying the same example here), we use different values. However, it is just a matter of the labels of rows and columns of the PC matrix that make it a real-life example. Therefore, this research does not contain any studies on human participants or animals conducted by the authors.

### 4.2 Example

Let us optimize an incomplete PC matrix  $A$  of the size 5 by 5 by estimating the missing data imputation (based on the geometric means of the triads), and subsequently by applying the iterative algorithm to minimize the inconsistency.

Consider the following 5x5 PC matrix with two missing data imputation,  $a_{14}$  and  $a_{25}$ :

$$A = \begin{bmatrix} 1 & 3 & 5 & ? & \frac{1}{7} \\ \frac{1}{3} & 1 & 4 & 6 & ? \\ \frac{1}{5} & \frac{1}{4} & 1 & 2 & \frac{1}{9} \\ ? & \frac{1}{6} & \frac{1}{2} & 1 & \frac{1}{3} \\ 7 & ? & 9 & 3 & 1 \end{bmatrix}$$

A missing value is in three triads with the missing value  $a_{14}$  and three triads with  $a_{25}$ ). The missing data imputation will be estimated using the geometric mean of each triad.

The estimation of  $a_{14}$  involved triads:

1. Triad (1, 2, 4):  $\sqrt{a_{12} \cdot a_{24}} = \sqrt{3 \cdot 6} = \sqrt{18} \approx 4.24$
2. Triad (1, 3, 4):  $\sqrt{a_{13} \cdot a_{34}} = \sqrt{5 \cdot 2} = \sqrt{10} \approx 3.16$
3. Triad (1, 5, 4):  $\sqrt{a_{15} \cdot a_{54}} = \sqrt{\frac{1}{7} \cdot 3} = \sqrt{\frac{3}{7}} \approx 0.654$

Taking the geometric mean of the three estimated values:

$$a_{14} \approx \sqrt[3]{4.24 \cdot 3.16 \cdot 0.654} \approx \sqrt[3]{8.762} \approx 2.062$$

The estimation of  $a_{25}$  involved the following three triads:

1. Triad (2, 4, 5):  $\sqrt{a_{24} \cdot a_{45}} = \sqrt{6 \cdot \frac{1}{3}} = \sqrt{2} \approx 1.414$
2. Triad (2, 3, 5):  $\sqrt{a_{23} \cdot a_{35}} = \sqrt{4 \cdot 9} = \sqrt{36} = 6$
3. Triad (1, 2, 5):  $\sqrt{a_{12} \cdot a_{15}} = \sqrt{3 \cdot \frac{1}{7}} = \sqrt{\frac{3}{7}} \approx 0.654$

Taking the geometric mean of the three estimated values:

$$a_{25} \approx \sqrt[3]{1.414 \cdot 6 \cdot 0.654} \approx \sqrt[3]{5.541} \approx 1.77$$

After estimating the missing data imputation, the updated matrix  $A^{(0)}$  becomes:

$$A^{(0)} = \begin{bmatrix} 1 & 3 & 5 & 2.062 & \frac{1}{7} \\ \frac{1}{3} & 1 & 4 & 6 & 1.77 \\ \frac{1}{5} & \frac{1}{4} & 1 & 2 & \frac{1}{9} \\ \frac{2.062}{7} & \frac{1}{6} & \frac{1}{2} & 1 & \frac{1}{3} \\ \frac{1}{1.77} & \frac{1}{9} & \frac{1}{3} & 3 & 1 \end{bmatrix}$$

The iterative algorithm is executed to minimize the global inconsistency of the matrix, progressively updating each element  $a_{ij}$  of the matrix.

The update of each element is performed according to the formula:

$$a_{ij}^{(t+1)} = a_{ij}^{(t)} + \eta \cdot \left( \frac{1}{3} \sum_{k \neq i,j} \frac{a_{ik}^{(t)} \cdot a_{kj}^{(t)}}{a_{ij}^{(t)}} - a_{ij}^{(t)} \right)$$

where:

- $\eta$  is the learning rate, set to  $\eta = 0.1$ .
- The sum is computed for all  $k \neq i, j$ , representing the correction based on the triads involving  $a_{ij}$ .

The pseudocode for the iterative algorithm, which refers to python cod 1# in <https://doi.org/10.5281/zenodo.15267213>, is the following, while the explicit calculations of the inconsistencies obtained following this algorithm are present in *Appendix A*:

### 4.3 The final PC matrix and its global inconsistency

The final matrix, obtained at the end of the minimization process (discussed in *subsection A.1*, see *Appendix A*), using the python code 2# (present in <https://doi.org/10.5281/zenodo.15267213>), is the following:

$$A^{(\text{final})} = \begin{bmatrix} 1 & 1.17322357 & 2.40769248 & 2.55690073 & 1.56817393 \\ 0.85235246 & 1 & 2.05398016 & 2.44533255 & 1.36450547 \\ 0.41533543 & 0.48685962 & 1 & 1.14086518 & 0.66451811 \\ 0.39109848 & 0.40894233 & 0.87652776 & 1 & 0.58520661 \\ 0.63768437 & 0.73286625 & 1.50484987 & 1.70879821 & 1 \end{bmatrix}$$

The global inconsistency  $I(A)$  converges to the value  $I(A) \approx 0.3$ .

The algorithm has significantly improved the global inconsistency with respect to the matrix  $A^{(9)}$ .

In fact, the inconsistencies of the triads of the matrix  $A^{(9)}$  are:

$K_{123} \approx 0.177$ ;  $K_{124} \approx 0.446$ ;  $K_{125} \approx 0.237$ ;  $K_{134} \approx 0.281$ ;  $K_{135} \approx 0.208$ ;  
 $K_{145} \approx 0.01$ ;  $K_{234} \approx 0.078$ ;  $K_{235} \approx 0.145$ ;  $K_{245} \approx 0.286$ ;  $K_{345} \approx 0.094$ ,  
 obtaining  $I(A) \approx 1.96$ .

**Algorithm 1. Biomimetic PCM optimization (pseudocode).****Input:**

- 1:  $\mathbf{A} \in \mathbb{R}^{n \times n}$ : Initial PC matrix with missing/inconsistent entries
- 2:  $\eta$ : Learning rate
- 3:  $\epsilon$ : Convergence threshold
- 4: max\_iter: Maximum iterations

**Output:**

- 5:  $\mathbf{A}' \in \mathbb{R}^{n \times n}$ : Optimized PC matrix
- 6: **procedure** BIOMIMETICREGENERATION( $\mathbf{A}, \eta, \epsilon, \text{max\_iter}$ )
- 7:   Initialize missing  $a_{ij}$  using geometric means of valid triads:

$$a_{ij}^{(0)} = \left( \prod_{k \neq i, j} a_{ik} a_{kj} \right)^{1/(n-2)}$$

```

8:    $\mathbf{A}_{\text{current}} \leftarrow \mathbf{A}$ 
9:    $t \leftarrow 0$ 
10:  while  $t < \text{max\_iter}$  do
11:     $\mathbf{A}_{\text{new}} \leftarrow \text{copy}(\mathbf{A}_{\text{current}})$ 
12:    for  $i$  from 0 to  $n-1$  do
13:      for  $j$  from  $i+1$  to  $n-1$  do
14:         $\text{sum\_term} \leftarrow 0$ 
15:        for  $k$  from 0 to  $n-1$  do
16:          if  $k \neq i \wedge k \neq j$  then
17:             $\text{sum\_term} \leftarrow \text{sum\_term} + \frac{\mathbf{A}_{\text{current}}[i,k] \cdot \mathbf{A}_{\text{current}}[k,j]}{\mathbf{A}_{\text{current}}[i,j]}$ 
18:          end if
19:        end for
20:         $\Delta a_{ij} \leftarrow \eta \cdot \left( \frac{\text{sum\_term}}{n-2} - \mathbf{A}_{\text{current}}[i,j] \right)$ 
21:        Update  $a_{ij}$  and enforce reciprocity:

```

$$\mathbf{A}_{\text{new}}[i,j] \leftarrow \mathbf{A}_{\text{current}}[i,j] + \Delta a_{ij}$$

$$\mathbf{A}_{\text{new}}[j,i] \leftarrow \frac{1}{\mathbf{A}_{\text{new}}[i,j]}$$

```

22:      end for
23:    end for
24:    Compute difference between iterations:

```

$$\text{diff} \leftarrow \max_{ij} |\mathbf{A}_{\text{new}}[i,j] - \mathbf{A}_{\text{current}}[i,j]|$$

```

25:    if  $\text{diff} < \epsilon$  then
26:      return  $\mathbf{A}_{\text{new}}$ 
27:    end if
28:     $\mathbf{A}_{\text{current}} \leftarrow \mathbf{A}_{\text{new}}$ 
29:     $t \leftarrow t + 1$ 
30:  end while
31:  return  $\mathbf{A}_{\text{current}}$ 
32: end procedure

```

## 5 Conclusions and future research

The proposed biomimetic model for PCs represents a mathematically rigorous method for computing inconsistencies and missing data (elements) PC matrices. By integrating biological principles of tissue regeneration with numerical optimization techniques, the proposed algorithm reduces inconsistencies in PC matrices, thereby enhancing the reliability of decisions made based on them.

In future research, we plan to analyze the use of orthogonalization [21] as observed in biological systems such as the orthogonal positioning of plants. We will also explore adding a rating scale to our biomimetic model presented in [35]. Furthermore, we intend to investigate the application of tensors to simplify the computation of multidimensional relationships within PC matrices. This could lead to substantial changes in the traditional approach of comparing only two elements at a time. By using tensors, we can model multiple dimensions, such as the comparisons between three or more parameters of a biomimetic system, which may include biological, mechanical, and environmental properties. The application of tensors would also simplify computations needed to reduce inconsistency at multiple levels and variables.

In general, solving complex human problems through a biomimetic approach is of considerable importance for our civilization. Our future research will focus on exploring the origins of reasoning by leveraging biomimetic principles, as suggested in our previous work [36].

## Acknowledgments

The authors recognize the efforts of Dr Julia Johnson, Professor Emeritus, Laurentian University, and Tamar Kakiashvili, MD, PhD, RP, for proofreading this text.

## Appendix A

1. *Matrix update*: At each iteration, the update-matrix function is called to compute the new PC matrix  $A_{\text{new}}$ .
2. *Difference checking*: The difference between the current PC matrix and the updated PC matrix is computed using the matrix-difference function. If this difference is less than the convergence threshold  $\zeta$ , the cycle stops (the matrix is considered converged).
3. *Current PC matrix updating*: If convergence is not reached, the updated PC matrix  $A_{\text{new}}$  becomes the new current matrix  $A$ , and the iteration loop repeats.
4. *Iteration increment*: In each iteration loop, the iteration counter increases by 1. If the maximum number of iterations (max-iterations) is reached, the cycle stops regardless of the computed difference.

After nine iterations, the values of inconsistency  $K_{ii}$  drop to a very low level of inconsistency. The final result of the matrix is as follows:

$$A^{(9)} = \begin{bmatrix} 1 & 1.4679 & 2.5258 & 2.2416 & 1.4707 \\ 0.6812 & 1 & 2.0896 & 2.7550 & 1.3139 \\ 0.3959 & 0.4786 & 1 & 1.2240 & 0.7351 \\ 0.4461 & 0.3630 & 0.8170 & 1 & 0.6627 \\ 0.6799 & 0.7611 & 1.3604 & 1.5090 & 1 \end{bmatrix}$$

1. Triad (1,2,3):

$$a_{12} = 1.4679, \quad a_{23} = 2.0896, \quad a_{13} = 2.5258$$

$$K_{ii} = \left| 1 - \frac{a_{13}}{a_{12} \cdot a_{23}} \right| \approx 0.177$$

2. Triad (1,2,4):

$$a_{12} = 1.4679, \quad a_{24} = 2.7550, \quad a_{14} = 2.2416$$

$$K_{ii} = \left| 1 - \frac{a_{14}}{a_{12} \cdot a_{24}} \right| \approx 0.446$$

3. Triad (1,2,5):

$$a_{12} = 1.4679, \quad a_{25} = 1.3139, \quad a_{15} = 1.4707$$

$$K_{ii} = \left| 1 - \frac{a_{15}}{a_{12} \cdot a_{25}} \right| \approx 0.237$$

4. Triad (1,3,4):

$$a_{13} = 2.5258, \quad a_{34} = 1.2240, \quad a_{14} = 2.2416$$

$$K_{ii} = \left| 1 - \frac{a_{14}}{a_{13} \cdot a_{34}} \right| \approx 0.281$$

5. Triad (1,3,5):

$$a_{13} = 2.5258, \quad a_{35} = 0.7351, \quad a_{15} = 1.4707$$

$$K_{ii} = \left| 1 - \frac{a_{15}}{a_{13} \cdot a_{35}} \right| \approx 0.208$$

6. Triad (1,4,5):

$$a_{14} = 2.2416, \quad a_{45} = 0.6627, \quad a_{15} = 1.4707$$

$$K_{ii} = \left| 1 - \frac{a_{14} \cdot a_{45}}{a_{15}} \right| \approx 0.01$$

7. Triad (2,3,4):

$$a_{23} = 2.0896, \quad a_{34} = 1.2240, \quad a_{24} = 2.7550$$

$$K_{ii} = \left| 1 - \frac{a_{23} \cdot a_{34}}{a_{24}} \right| \approx 0.078$$

8. Triad (2,3,5):

$$a_{23} = 2.0896, \quad a_{35} = 0.7351, \quad a_{25} = 1.3139$$

$$K_{ii} = \left| 1 - \frac{a_{25}}{a_{23} \cdot a_{35}} \right| \approx 0.145$$

9. Triad (2,4,5):

$$a_{24} = 2.7550, \quad a_{45} = 0.6627, \quad a_{25} = 1.3139$$

$$K_{ii} = \left| 1 - \frac{a_{25}}{a_{24} \cdot a_{45}} \right| \approx 0.286$$

10. Triad (3,4,5):

$$a_{34} = 1.2240, \quad a_{45} = 0.6627, \quad a_{35} = 0.7351$$

$$K_{ii} = \left| 1 - \frac{a_{35}}{a_{34} \cdot a_{45}} \right| \approx 0.094$$

The iterative algorithm has significantly reduced the local inconsistency of the matrix after a limited number of iterations. The limit of inconsistency was analyzed in [22] and the number of iterations in [37].

### A.1. Minimization of $I(A)$ using gradient descent

We proceed with minimizing  $I(A)$  using gradient descent, applying this procedure until the global inconsistency,  $I(A)$ , drops to the threshold of approximately 0.3.

The update of each  $a_{ij}$  follows this rule:

$$a_{ij}^{(t+1)} = a_{ij}^{(t)} - \eta \cdot \frac{\partial I(A)}{\partial a_{ij}}$$

where  $\frac{\partial I(A)}{\partial a_{ij}}$  is the derivative of  $I(A)$  with respect to  $a_{ij}$ , obtained by summing the contributions of all triads involving  $a_{ij}$ .

Below is the pseudocode (which refers to the Python code 2# in <https://doi.org/10.5281/zenodo.15267213>), for global inconsistency minimization  $I(A)$ :

## Appendix B: Dimensionality reduction with PCA for large pairwise comparison matrices

This appendix demonstrates how Principal Component Analysis (PCA) can be used to reduce the size of a large pairwise comparison (PC) matrix while preserving its essential structure. The reduced matrix is then stabilized using the biomimetic algorithm described in the paper, achieving low inconsistency ( $I(A)$ ) in fewer iterations.

### B.1. PCA-based reduction

The objective is reduce a  $n \times n$  PC matrix to a smaller  $k \times k$  matrix ( $k < n$ ) while retaining key priorities.

The steps are:

- 1. Symmetrize the matrix:

$$A_{\text{symmetric}} = \frac{A + A^T}{2}$$

This ensures the matrix is symmetric, a requirement for PCA.

- 2. Apply PCA: Extract  $k$  principal components to capture the most variance in the data.
- 3. Cluster components: Use  $k$ -means clustering to group the original elements into  $k$  clusters.
- 4. Form Reduced Matrix: For each pair of clusters  $(i, j)$ , compute the geometric mean of all pairwise comparisons between elements in clusters  $i$  and  $j$ .



**Algorithm 2. Global inconsistency minimization (pseudocode).**

**Input:** Initial PC matrix  $A \in \mathbb{R}^{n \times n}$ , learning rate  $\eta$ , maximum iterations  $\text{max\_iter}$ , stopping threshold  $\epsilon$

**Output:** Optimized PC matrix  $A' \in \mathbb{R}^{n \times n}$  with  $I(A') \leq \epsilon$

```

1: Initialization:
2:  $A_{\text{current}} \leftarrow A$ 
3:  $t \leftarrow 0$ 
4: while  $t < \text{max\_iter}$  do
5:    $A_{\text{new}} \leftarrow \text{copy}(A_{\text{current}})$ 
6:   for  $i$  from 0 to  $n-1$  do
7:     for  $j$  from  $i+1$  to  $n-1$  do
8:        $\text{sum\_term} \leftarrow 0$ 
9:       for  $k$  from 0 to  $n-1$  do
10:        if  $k \neq i \wedge k \neq j$  then
11:           $\text{term} \leftarrow \frac{A_{\text{current}}[i,k] \cdot A_{\text{current}}[k,j]}{A_{\text{current}}[i,j]}$ 
12:           $\text{sum\_term} \leftarrow \text{sum\_term} + \text{term}$ 
13:        end if
14:      end for
15:      Compute correction term:

```

$$\Delta a_{ij} \leftarrow \eta \cdot \left( \frac{\text{sum\_term}}{n-2} - A_{\text{current}}[i,j] \right)$$

```

16:      Update  $a_{ij}$ :
17:       $A_{\text{new}}[i,j] \leftarrow A_{\text{current}}[i,j] + \Delta a_{ij}$ 
18:      Enforce reciprocity:
19:       $A_{\text{new}}[j,i] \leftarrow \frac{1}{A_{\text{new}}[i,j]}$ 
20:    end for
21:  end for
22:  Compute  $I_{\text{new}} \leftarrow I(A_{\text{new}})$ 
23:  if  $I_{\text{new}} < \epsilon$  then
24:    return  $A_{\text{new}}, I_{\text{new}}$ 
25:  end if
26:   $A_{\text{current}} \leftarrow A_{\text{new}}$ 
27:   $t \leftarrow t + 1$ 
28: end while
29: Compute  $I_{\text{final}} \leftarrow I(A_{\text{current}})$ 
30: return  $A_{\text{current}}, I_{\text{final}}$ 

```

**B.2. Biomimetic algorithm on reduced matrix**

The reduced  $k \times k$  matrix is stabilized using the algorithm from the paper:

- 1. Update rule:

$$A_{\text{new}}[i,j] = A_{\text{current}}[i,j] + \eta \left( \frac{\sum_{k \neq i,j} \frac{A_{\text{current}}[i,k] \cdot A_{\text{current}}[k,j]}{A_{\text{current}}[i,j]}}{n-2} - A_{\text{current}}[i,j] \right)$$

where  $\eta$  is the learning rate (set to 0.1), and  $n$  is the matrix size.

- 2. Stopping condition: The algorithm stops when the difference between consecutive matrices falls below  $\zeta = 0.03$  or after  $max\_iterations = 4$ .

### B.3. Example with a $5 \times 5$ matrix from section *Example of the paper*

*Original Matrix:*

$$A_{5 \times 5} = \begin{bmatrix} 1 & 3 & 5 & 2.062 & 1/7 \\ 1/3 & 1 & 4 & 6 & 1.77 \\ 1/5 & 1/4 & 1 & 2 & 1/9 \\ 1/2.062 & 1/6 & 1/2 & 1 & 1/3 \\ 7 & 1/1.77 & 9 & 3 & 1 \end{bmatrix}$$

Using the following pseudocode, [Algorithm 3](#), (referring to the Python 3# code, present in <https://doi.org/10.5281/zenodo.15267213>), which involves the reduction of dimensionality with PCA, the stabilization of the PC matrix through the iterative algorithm and finally the minimization of the global inconsistency  $I(A)$ , we obtain:

- Reduced Matrix (3x3):

$$\begin{bmatrix} 1.00 & 4.24 & 3.03 \\ 0.24 & 1.00 & 0.49 \\ 0.33 & 2.03 & 1.00 \end{bmatrix}$$

with initial  $I(A)$  (3x3): 0.31

- Stabilization and minimization Process:

$$\begin{bmatrix} 1.00 & 3.19 & 2.28 \\ 0.31 & 1.00 & 0.73 \\ 0.44 & 1.38 & 1.00 \end{bmatrix}$$

with final  $I(A)$ : 0.002 (after 4 iterations).

### B.5. Discussion

PCA-based dimensionality reduction is a viable strategy for large PC matrices. The biomimetic algorithm efficiently stabilizes the reduced matrix, preserving the main priorities while reducing the computational burden, in fact after only 4 iterations the matrix reaches an inconsistency of 0.002. The Computational complexity has been reduced from  $O(5^3) = 125$  to  $O(3^3) = 27$ , that is, from a cost of 1125 necessary operations (as seen in the *Section Example*) to only 108.

**Algorithm 3. PCA-Based dimensionality reduction for PC matrices (pseudocode).**

**Input:** Original PC matrix  $A \in \mathbb{R}^{n \times n}$ , target dimension  $k$ , learning rate  $\eta$ , stopping threshold  $\epsilon$ , maximum iterations  $\text{max\_iter}$

**Output:** Stabilized PC matrix  $A' \in \mathbb{R}^{k \times k}$ , Final global inconsistency  $I_{\text{final}}$

```

1: Symmetrize the matrix:  $A_{\text{sym}} \leftarrow \frac{A+A^T}{2}$ 
2: Compute top  $k$  eigenvectors of  $A_{\text{sym}}$ , project to get transformed  $\in \mathbb{R}^{n \times k}$ 
3: Apply K-means clustering to transformed, obtaining clusters  $\in \mathbb{N}^n$ 
4: Initialize  $\text{indices}_0, \text{indices}_1, \dots, \text{indices}_{k-1}$  as empty lists
5: for  $p$  from 0 to  $n-1$  do
6:    $c \leftarrow \text{clusters}[p]$ 
7:   Add  $p$  to  $\text{indices}_c$ 
8: end for
9: Initialize  $A_{\text{reduced}}$  as  $k \times k$  matrix with diagonal entries 1
10: for  $i$  from 0 to  $k-1$  do
11:   for  $j$  from  $i+1$  to  $k-1$  do
12:     Collect elements  $\{A[p, q] \mid p \in \text{indices}_i, q \in \text{indices}_j\}$  from original  $A$ 
13:     if elements non-empty then
14:        $\mu_{ij} \leftarrow (\prod_{e \in \text{elements}} e)^{1/\text{len}(\text{elements})}$ 
15:        $A_{\text{reduced}}[i, j] \leftarrow \mu_{ij}$ 
16:        $A_{\text{reduced}}[j, i] \leftarrow 1/\mu_{ij}$ 
17:     else
18:        $A_{\text{reduced}}[i, j] \leftarrow 1, A_{\text{reduced}}[j, i] \leftarrow 1$ 
19:     end if
20:   end for
21: end for
22:  $A_{\text{current}} \leftarrow A_{\text{reduced}}$ 
23:  $t \leftarrow 0$ 
24: while  $t < \text{max\_iter}$  do
25:    $A_{\text{new}} \leftarrow \text{copy}(A_{\text{current}})$ 
26:   for  $i$  from 0 to  $k-1$  do
27:     for  $j$  from  $i+1$  to  $k-1$  do
28:        $\text{sum\_term} \leftarrow \frac{1}{k-2} \sum_{\substack{m=0 \\ m \neq i, j}}^{k-1} \frac{A_{\text{current}}[i, m] \cdot A_{\text{current}}[m, j]}{A_{\text{current}}[i, j]}$ 
29:        $\Delta a_{ij} \leftarrow \eta \cdot (\text{sum\_term} - A_{\text{current}}[i, j])$ 
30:        $A_{\text{new}}[i, j] \leftarrow A_{\text{current}}[i, j] + \Delta a_{ij}$ 
31:       Enforce reciprocity:  $A_{\text{new}}[j, i] \leftarrow 1/A_{\text{new}}[i, j]$ 
32:     end for
33:   end for
34:   Compute  $I_{\text{new}} \leftarrow I(A_{\text{new}})$ 
35:   if  $I_{\text{new}} < \epsilon$  then
36:      $A_{\text{current}} \leftarrow A_{\text{new}}$ 
37:     break
38:   end if
39:    $A_{\text{current}} \leftarrow A_{\text{new}}$ 
40:    $t \leftarrow t + 1$ 
41: end while
42: Compute  $I_{\text{final}} \leftarrow I(A_{\text{current}})$ 
43: return  $A_{\text{current}}, I_{\text{final}}$ 

```

## Author contributions

**Conceptualization:** Alexander Pigazzini, Laura P. Pigazzini.

**Formal analysis:** Alexander Pigazzini.

**Investigation:** Waldemar W. Koczkodaj, Witold Pedrycz, Laura P. Pigazzini.

**Methodology:** Waldemar W. Koczkodaj, Alexander Pigazzini.

**Project administration:** Waldemar W. Koczkodaj.

**Supervision:** Waldemar W. Koczkodaj, Witold Pedrycz.

**Validation:** Waldemar W. Koczkodaj, Witold Pedrycz.

**Writing – original draft:** Alexander Pigazzini, Laura P. Pigazzini.

**Writing – review & editing:** Waldemar W. Koczkodaj, Alexander Pigazzini.

## References

1. Trask RS, Williams HR, Bond IP. Self-healing polymer composites: mimicking nature to enhance performance. *Bioinspir Biomim*. 2007;2(1):P1-9. <https://doi.org/10.1088/1748-3182/2/1/P01> PMID: 17671320
2. Bar-Cohen Y. Biomimetics—using nature to inspire human innovation. *Bioinspir Biomim*. 2006;1(1):P1–12. <https://doi.org/10.1088/1748-3182/1/1/P01> PMID: 17671297
3. Koczkodaj WW, Szybowski J, Wajch E. Inconsistency indicator maps on groups for pairwise comparisons. *Int J Approx Reason*. 2016;69:81–90.
4. Koczkodaj WW, Szybowski J. Pairwise comparisons simplified. *Appl Math Comput*. 2015;253:387–94.
5. Dixit PD. Entropy production rate as a criterion for inconsistency in decision theory. *J Statist Mech: Theory Exp*. 2018;:053408.
6. Moldoveanu S, David V. Affinity, immunoaffinity, and aptamer type HPLC. *Essentials in modern HPLC separations*, 2nd edn; 2022.
7. Balakrishnan B, Joshi N, Jayakrishnan A, Banerjee R. Self-crosslinked oxidized alginate/gelatin hydrogel as injectable, adhesive biomimetic scaffolds for cartilage regeneration. *Acta Biomater*. 2014;10(8):3650–63. <https://doi.org/10.1016/j.actbio.2014.04.031> PMID: 24811827
8. Huang G, Li F, Zhao X, Ma Y, Li Y, Lin M, et al. Functional and biomimetic materials for engineering of the three-dimensional cell microenvironment. *Chem Rev*. 2017;117(20):12764–850. <https://doi.org/10.1021/acs.chemrev.7b00094> PMID: 28991456
9. Kim H-W, Kim H-E, Salih V. Stimulation of osteoblast responses to biomimetic nanocomposites of gelatin-hydroxyapatite for tissue engineering scaffolds. *Biomaterials*. 2005;26(25):5221–30. <https://doi.org/10.1016/j.biomaterials.2005.01.047> PMID: 15792549
10. Kim HD, Amirthalingam S, Kim SL, Lee SS, Rangasamy J, Hwang NS. Biomimetic materials and fabrication approaches for bone tissue engineering. *Adv Healthc Mater*. 2017;6(23).
11. Moutos FT, Freed LE, Guilak F. A biomimetic three-dimensional woven composite scaffold for functional tissue engineering of cartilage. *Nat Mater*. 2007;6(2):162–7. <https://doi.org/10.1038/nmat1822> PMID: 17237789
12. Ding F, Song JH, Jung JY, Lou L, Wang M, Charles L, et al. A biomimetic membrane device that modulates the excessive inflammatory response to sepsis. *PLoS One*. 2011;6(4):e18584. <https://doi.org/10.1371/journal.pone.0018584> PMID: 21533222
13. Yuan H, Huang C, Zhang S. Virus-inspired design principles of nanoparticle-based bioagents. *PLoS One*. 2010;5(10):e13495. <https://doi.org/10.1371/journal.pone.0013495> PMID: 20976064
14. Takeoka Y, Matsumoto K, Taniguchi D, Tsuchiya T, Machino R, Moriyama M, et al. Regeneration of esophagus using a scaffold-free biomimetic structure created with bio-three-dimensional printing. *PLoS One*. 2019;14(3):e0211339. <https://doi.org/10.1371/journal.pone.0211339> PMID: 30849123
15. Clavica F, Zhao X, ElMahdy M, Drake MJ, Zhang X, Carugo D. Investigating the flow dynamics in the obstructed and stented ureter by means of a biomimetic artificial model. *PLoS One*. 2014;9(2):e87433. <https://doi.org/10.1371/journal.pone.0087433> PMID: 24498322

16. Colin SP, Costello JH, Dabiri JO, Villanueva A, Blottman JB, Gemmell BJ, et al. Biomimetic and live medusae reveal the mechanistic advantages of a flexible bell margin. *PLoS One*. 2012;7(11):e48909. <https://doi.org/10.1371/journal.pone.0048909> PMID: 23145016
17. Di Natale C, Martinelli E, Paolesse R, D'Amico A, Filippini D, Lundström I. An experimental biomimetic platform for artificial olfaction. *PLoS One*. 2008;3(9):e3139. <https://doi.org/10.1371/journal.pone.0003139> PMID: 18769554
18. Steckel J, Peremans H. BatSLAM: Simultaneous localization and mapping using biomimetic sonar. *PLoS One*. 2013;8(1):e54076. <https://doi.org/10.1371/journal.pone.0054076> PMID: 23365647
19. Wu S, Liu X, Yeung KWK, Liu C, Yang X. Biomimetic porous scaffolds for bone tissue engineering. *Mater Sci Eng R-Reports*. 2014;80:1–36.
20. Landgraf T, Rojas R, Nguyen H, Kriegel F, Stettin K. Analysis of the waggle dance motion of honeybees for the design of a biomimetic honeybee robot. *PLoS One*. 2011;6(8):e21354. <https://doi.org/10.1371/journal.pone.0021354> PMID: 21857906
21. Koczkodaj WW, Orlowski M. An orthogonal basis for computing a consistent approximation to a pairwise comparisons matrix. *Comput Math Appl*. 1997;34(10):41–7.
22. Koczkodaj WW, Szybowski J. The limit of inconsistency reduction in pairwise comparisons. *Int J Appl Math Comput Sci*. 2016;26(3):721–9. <https://doi.org/10.1515/amcs-2016-0050>
23. Triantaphyllou E, Mann SH. An examination of the effectiveness of multi-dimensional decision making methods: a decision making paradox. *Decis Sci*. 1989;20(2):507–35.
24. Ergu D, Kou G, Shi Y, Chen E. Multiple criteria decision analysis based on pairwise comparisons and multiplicative consistency. *Eur J Oper Res*. 2011;216(3):679–87.
25. Liu F, Zhang WG, Zhang L. A least squares method to priority of the fuzzy complementary judgment matrix and its application. *J Intell Fuzzy Syst*. 2015;28(3):1247–55.
26. Luo Y. Evaluating the state of the art in missing data imputation for clinical data. *Briefings Bioinform*. 2022;23:1–9.
27. Buuren S van, Groothuis-Oudshoorn K. mice: multivariate imputation by chained equations in R. *J Stat Soft*. 2011;45(3). <https://doi.org/10.18637/jss.v045.i03>
28. Rubin DB. Multiple Imputation for Nonresponse in Surveys. *Wiley Series in Probability and Statistics*. Wiley; 1987. <https://doi.org/10.1002/9780470316696>
29. Schafer JL, Graham JW. Missing data: our view of the state of the art. *Psychol Methods*. 2002;7(2):147–77. PMID: 12090408
30. Costantini E, Lang KM, Reeskens T, Sijtsma K. High-dimensional imputation for the social sciences: a comparison of state-of-the-art methods. *Sociol Methods Res*. 2025;54(2):448–99.
31. Encyclopedia Britannica. Regeneration. <https://www.britannica.com/science/regeneration-biology>
32. Koczkodaj WW, Szwarc R. On axiomatization of inconsistency indicators for pairwise comparisons. *arXiv preprint* 2013. <https://arxiv.org/abs/1307.6272v4>
33. Esteban PG, Bagheri E, Elprama SA, Jewell CIC, Cao H-L, De Beir A, et al. Should i be introvert or extrovert? a pairwise robot comparison assessing the perception of personality-based social robot behaviors. *Int J of Soc Robotics*. 2021;14(1):115–25. <https://doi.org/10.1007/s12369-020-00715-z>
34. Kakiashvili T, Koczkodaj WW, Woodbury-Smith M. Improving the medical scale predictability by the pairwise comparisons method: evidence from a clinical data study. *Comput Methods Prog Biomed*. 2012;105(3):210–6. <https://doi.org/10.1016/j.cmpb.2011.09.011> PMID: 22088867
35. Koczkodaj WW, Kakiashvili T, Szymańska A, Montero-Marin J, Araya R, Garcia-Campayo J, et al. How to reduce the number of rating scale items without predictability loss? *Scientometrics*. 2017;111(2):581–93. <https://doi.org/10.1007/s11192-017-2283-4> PMID: 28490822
36. Kakiashvili T, Koczkodaj WW, Magnot J-P. Approximate reasoning by pairwise comparisons: “Topodynamics of metastable brains” by Arturo Tozzi, et al. *Phys Life Rev*. 2017;21:37–9. <https://doi.org/10.1016/j.plrev.2017.04.001> PMID: 28476534
37. Koczkodaj WW, Kosiek N, Szybowski J, Xue D. Fast convergence of distance-based inconsistency in pairwise comparisons. *Fundamenta Informaticae*. 2015;137(3):355–67.
